# Supplementary material
Source: publisher figshare collection journal article supplement (https://acs.figshare.com/ndownloader/files/5139115)
Supplement: Supplementary file 1 [file 5139115]

data_publication_text
_publ_requested_journal          Organometallics
_publ_contact_author_name        'Scott Collins'
_publ_contact_author_address
;Department of Polymer Science
University of Akron
170 University Avenue
Akron, Ohio, USA 44325-3909
;
loop_
_publ_author_name
_publ_author_address
'Rainer Vollmerhaus'
;Department of Chemistry
University of Waterloo
170 University Avenue
Waterloo, Ontario, Canada
N2L 3G1
;
'Robert Tomaszewski'
;Department of Chemistry
University of Waterloo
170 University Avenue
Waterloo, Ontario, Canada
N2L 3G1
;
'Pengcheng Shao'
;Department of Chemistry
University of Waterloo
170 University Avenue
Waterloo, Ontario, Canada
N2L 3G1
;
'Nicholas J. Taylor'
;Department of Chemistry
University of Waterloo
170 University Avenue
Waterloo, Ontario, Canada
N2L 3G1
;
'Kevin J. Wiacek'
;Department of Polymer Science
University of Akron
170 University Avenue
Akron, Ohio, USA 44325-3909
;
'Stewart P. Lewis'
;Department of Polymer Science
University of Akron
170 University Avenue
Akron, Ohio, USA 44325-3909
;
'Abdulaziz Al-Humydi'
;Department of Polymer Science
University of Akron
170 University Avenue
Akron, Ohio, USA 44325-3909
;
'Scott Collins'
;Department of Polymer Science
University of Akron
170 University Avenue
Akron, Ohio, USA 44325-3909
;
  
data_zr788 
 
_audit_creation_method            SHELXL-97 
_chemical_name_systematic 
; 
 ? 
; 
_chemical_name_common             ? 
_chemical_melting_point           ? 
_chemical_formula_moiety          ? 
_chemical_formula_sum 
 'C20 H36 Cl4 N3 P Si2 Zr' 
_chemical_formula_weight          638.69 
 
loop_ 
 _atom_type_symbol 
 _atom_type_description 
 _atom_type_scat_dispersion_real 
 _atom_type_scat_dispersion_imag 
 _atom_type_scat_source 
 'C'  'C'   0.0033   0.0016 
 'International Tables Vol C Tables 4.2.6.8 and 6.1.1.4' 
 'H'  'H'   0.0000   0.0000 
 'International Tables Vol C Tables 4.2.6.8 and 6.1.1.4' 
 'N'  'N'   0.0061   0.0033 
 'International Tables Vol C Tables 4.2.6.8 and 6.1.1.4' 
 'Si'  'Si'   0.0817   0.0704 
 'International Tables Vol C Tables 4.2.6.8 and 6.1.1.4' 
 'P'  'P'   0.1023   0.0942 
 'International Tables Vol C Tables 4.2.6.8 and 6.1.1.4' 
 'Cl'  'Cl'   0.1484   0.1585 
 'International Tables Vol C Tables 4.2.6.8 and 6.1.1.4' 
 'Zr'  'Zr'  -2.9673   0.5597 
 'International Tables Vol C Tables 4.2.6.8 and 6.1.1.4' 
 
_symmetry_cell_setting            Monoclinic
_symmetry_space_group_name_H-M    P2(1)/n
 
loop_ 
 _symmetry_equiv_pos_as_xyz 
 'x, y, z' 
 '-x+1/2, y+1/2, -z+1/2' 
 '-x, -y, -z' 
 'x-1/2, -y-1/2, z-1/2' 
 
_cell_length_a                    9.1834(9) 
_cell_length_b                    16.5692(13) 
_cell_length_c                    20.1712(19) 
_cell_angle_alpha                 90.00 
_cell_angle_beta                  90.541(7) 
_cell_angle_gamma                 90.00 
_cell_volume                      3069.1(5) 
_cell_formula_units_Z             4 
_cell_measurement_temperature     160(2) 
_cell_measurement_reflns_used     25 
_cell_measurement_theta_min       10.93
_cell_measurement_theta_max       15.69
 
_exptl_crystal_description        'Prism' 
_exptl_crystal_colour             'Colourless'
_exptl_crystal_size_max           0.56
_exptl_crystal_size_mid           0.36
_exptl_crystal_size_min           0.21
_exptl_crystal_density_meas       ? 
_exptl_crystal_density_diffrn     1.382 
_exptl_crystal_density_method     'not measured' 
_exptl_crystal_F_000              1312 
_exptl_absorpt_coefficient_mu     0.850 
_exptl_absorpt_correction_type    'Integration' 
_exptl_absorpt_correction_T_min   0.741
_exptl_absorpt_correction_T_max   0.846
_exptl_absorpt_process_details    'Face-indexed analytical'
 
_exptl_special_details 
; 
 ? 
; 
 
_diffrn_ambient_temperature       160(2) 
_diffrn_radiation_wavelength      0.71073 
_diffrn_radiation_type            MoK\a 
_diffrn_radiation_source          'fine-focus sealed tube' 
_diffrn_radiation_monochromator   graphite 
_diffrn_measurement_device_type   'Bruker P4'
_diffrn_measurement_method        'Omega'
_diffrn_detector_area_resol_mean  ? 
_diffrn_standards_number          3
_diffrn_standards_interval_count  100 
_diffrn_standards_interval_time   ? 
_diffrn_standards_decay_%         +/-2%
_diffrn_reflns_number             5752 
_diffrn_reflns_av_R_equivalents   0.0123 
_diffrn_reflns_av_sigmaI/netI     0.0231 
_diffrn_reflns_limit_h_min        0 
_diffrn_reflns_limit_h_max        10 
_diffrn_reflns_limit_k_min        0 
_diffrn_reflns_limit_k_max        19 
_diffrn_reflns_limit_l_min        -23 
_diffrn_reflns_limit_l_max        23 
_diffrn_reflns_theta_min          2.36 
_diffrn_reflns_theta_max          25.00 
_reflns_number_total              5394 
_reflns_number_gt                 4829 
_reflns_threshold_expression      >2sigma(I) 
 
_computing_data_collection        'XSCANS'
_computing_cell_refinement        'XSCANS'
_computing_data_reduction         'XSCANS'
_computing_structure_solution     'SHELXTL' 
_computing_structure_refinement   'SHELXTL' 
_computing_molecular_graphics     'SHELXTL'
_computing_publication_material   'SHELXTL'
 
_refine_special_details 
; 
 Refinement of F^2^ against ALL reflections.  The weighted R-factor wR and 
 goodness of fit S are based on F^2^, conventional R-factors R are based 
 on F, with F set to zero for negative F^2^. The threshold expression of 
 F^2^ > 2sigma(F^2^) is used only for calculating R-factors(gt) etc. and is 
 not relevant to the choice of reflections for refinement.  R-factors based 
 on F^2^ are statistically about twice as large as those based on F, and R- 
 factors based on ALL data will be even larger. 
; 
 
_refine_ls_structure_factor_coef  Fsqd  
_refine_ls_matrix_type            full 
_refine_ls_weighting_scheme       calc  
_refine_ls_weighting_details 
 'calc w=1/[\s^2^(Fo^2^)+(0.0000P)^2^+0.0000P] where P=(Fo^2^+2Fc^2^)/3' 
_atom_sites_solution_primary      'Patterson and Fourier'
_atom_sites_solution_secondary    difmap 
_atom_sites_solution_hydrogens    geom 
_refine_ls_hydrogen_treatment     mixed 
_refine_ls_extinction_method      SHELXL 
_refine_ls_extinction_coef        0.00119(7) 
_refine_ls_extinction_expression 
 'Fc^*^=kFc[1+0.001xFc^2^\l^3^/sin(2\q)]^-1/4^' 
_refine_ls_number_reflns          5394 
_refine_ls_number_parameters      289 
_refine_ls_number_restraints      0 
_refine_ls_R_factor_all           0.0251 
_refine_ls_R_factor_gt            0.0214 
_refine_ls_wR_factor_ref          0.0500 
_refine_ls_wR_factor_gt           0.0497 
_refine_ls_goodness_of_fit_ref    1.823 
_refine_ls_restrained_S_all       1.823 
_refine_ls_shift/su_max           0.003 
_refine_ls_shift/su_mean          0.000 
 
loop_ 
 _atom_site_label 
 _atom_site_type_symbol 
 _atom_site_fract_x 
 _atom_site_fract_y 
 _atom_site_fract_z 
 _atom_site_U_iso_or_equiv 
 _atom_site_adp_type 
 _atom_site_occupancy 
 _atom_site_symmetry_multiplicity 
 _atom_site_calc_flag 
 _atom_site_refinement_flags 
 _atom_site_disorder_assembly 
 _atom_site_disorder_group 
Zr1 Zr 0.348000(19) 0.171591(10) 0.077119(8) 0.01716(6) Uani 1 1 d . . . 
Cl1 Cl 0.15282(5) 0.09101(3) 0.13020(2) 0.02741(11) Uani 1 1 d . . . 
Cl2 Cl 0.22211(5) 0.13624(3) -0.02815(2) 0.02737(11) Uani 1 1 d . . . 
Cl3 Cl 0.50247(5) 0.04883(3) 0.09045(2) 0.02551(11) Uani 1 1 d . . . 
Cl4 Cl 0.54996(5) 0.22777(3) 0.01082(2) 0.02584(11) Uani 1 1 d . . . 
P1 P 0.31495(5) 0.30148(3) 0.16624(2) 0.01701(10) Uani 1 1 d . . . 
Si1 Si 0.54478(6) 0.19461(3) 0.23269(3) 0.02248(12) Uani 1 1 d . . . 
Si2 Si 0.14332(6) 0.35386(3) 0.04234(3) 0.02540(13) Uani 1 1 d . . . 
N1 N 0.41474(16) 0.22134(9) 0.17251(7) 0.0176(3) Uani 1 1 d . . . 
N2 N 0.24775(16) 0.28919(9) 0.09237(7) 0.0182(3) Uani 1 1 d . . . 
C1 C 0.4229(2) 0.39229(11) 0.17193(9) 0.0211(4) Uani 1 1 d . . . 
C2 C 0.4118(2) 0.45061(11) 0.22123(9) 0.0273(4) Uani 1 1 d . . . 
H2 H 0.3428 0.4449 0.2543 0.033 Uiso 1 1 calc R . . 
C3 C 0.5032(3) 0.51716(12) 0.22128(10) 0.0357(5) Uani 1 1 d . . . 
H3 H 0.4949 0.5560 0.2543 0.043 Uiso 1 1 calc R . . 
C4 C 0.6059(3) 0.52610(13) 0.17279(11) 0.0400(6) Uani 1 1 d . . . 
H4 H 0.6661 0.5712 0.1727 0.048 Uiso 1 1 calc R . . 
C5 C 0.6198(3) 0.46787(13) 0.12404(12) 0.0469(7) Uani 1 1 d . . . 
H5 H 0.6903 0.4735 0.0916 0.056 Uiso 1 1 calc R . . 
C6 C 0.5292(2) 0.40146(13) 0.12358(11) 0.0364(5) Uani 1 1 d . . . 
H6 H 0.5390 0.3625 0.0907 0.044 Uiso 1 1 calc R . . 
C7 C 0.1770(2) 0.30473(11) 0.22972(9) 0.0202(4) Uani 1 1 d . . . 
C8 C 0.1601(2) 0.23839(12) 0.27139(9) 0.0260(4) Uani 1 1 d . . . 
H8 H 0.2193 0.1933 0.2663 0.031 Uiso 1 1 calc R . . 
C9 C 0.0551(2) 0.23927(13) 0.32060(10) 0.0317(5) Uani 1 1 d . . . 
H9 H 0.0454 0.1951 0.3487 0.038 Uiso 1 1 calc R . . 
C10 C -0.0342(2) 0.30494(13) 0.32799(10) 0.0337(5) Uani 1 1 d . . . 
H10 H -0.1034 0.3055 0.3614 0.040 Uiso 1 1 calc R . . 
C11 C -0.0215(2) 0.37021(13) 0.28580(11) 0.0359(5) Uani 1 1 d . . . 
H11 H -0.0839 0.4141 0.2900 0.043 Uiso 1 1 calc R . . 
C12 C 0.0838(2) 0.37028(12) 0.23743(10) 0.0305(5) Uani 1 1 d . . . 
H12 H 0.0927 0.4147 0.2096 0.037 Uiso 1 1 calc R . . 
C13 C 0.5522(2) 0.27137(13) 0.30033(10) 0.0373(5) Uani 1 1 d . . . 
H13X H 0.4571 0.2776 0.3190 0.056 Uiso 1 1 calc R . . 
H13Y H 0.5840 0.3221 0.2826 0.056 Uiso 1 1 calc R . . 
H13Z H 0.6193 0.2539 0.3342 0.056 Uiso 1 1 calc R . . 
C14 C 0.7266(2) 0.18799(14) 0.19355(11) 0.0356(5) Uani 1 1 d . . . 
H14X H 0.8003 0.1829 0.2274 0.053 Uiso 1 1 calc R . . 
H14Y H 0.7441 0.2359 0.1681 0.053 Uiso 1 1 calc R . . 
H14Z H 0.7296 0.1417 0.1649 0.053 Uiso 1 1 calc R . . 
C15 C 0.4917(2) 0.09546(12) 0.26918(10) 0.0364(5) Uani 1 1 d . . . 
H15X H 0.4666 0.0585 0.2342 0.055 Uiso 1 1 calc R . . 
H15Y H 0.4093 0.1028 0.2975 0.055 Uiso 1 1 calc R . . 
H15Z H 0.5717 0.0741 0.2946 0.055 Uiso 1 1 calc R . . 
C16 C 0.1548(3) 0.46139(13) 0.06957(12) 0.0577(8) Uani 1 1 d . . . 
H16X H 0.1099 0.4954 0.0367 0.086 Uiso 1 1 calc R . . 
H16Y H 0.2551 0.4764 0.0751 0.086 Uiso 1 1 calc R . . 
H16Z H 0.1052 0.4677 0.1109 0.086 Uiso 1 1 calc R . . 
C17 C -0.0469(3) 0.31839(19) 0.0416(2) 0.0995(15) Uani 1 1 d . . . 
H17X H -0.0877 0.3251 0.0849 0.149 Uiso 1 1 calc R . . 
H17Y H -0.0497 0.2624 0.0295 0.149 Uiso 1 1 calc R . . 
H17Z H -0.1025 0.3492 0.0100 0.149 Uiso 1 1 calc R . . 
C18 C 0.2166(3) 0.35235(14) -0.04270(11) 0.0589(8) Uani 1 1 d . . . 
H18X H 0.1629 0.3896 -0.0699 0.088 Uiso 1 1 calc R . . 
H18Y H 0.2074 0.2990 -0.0608 0.088 Uiso 1 1 calc R . . 
H18Z H 0.3174 0.3676 -0.0415 0.088 Uiso 1 1 calc R . . 
N3 N 0.75469(18) 0.06824(10) -0.02683(8) 0.0305(4) Uani 1 1 d . . . 
H3X H 0.6642 0.0827 -0.0149 0.037 Uiso 1 1 calc R . . 
H3Y H 0.7523 0.0156 -0.0377 0.037 Uiso 1 1 calc R . . 
C19 C 0.7965(3) 0.11539(14) -0.08571(11) 0.0404(6) Uani 1 1 d . . . 
H19X H 0.8922 0.0996 -0.0994 0.061 Uiso 1 1 calc R . . 
H19Y H 0.7964 0.1718 -0.0750 0.061 Uiso 1 1 calc R . . 
H19Z H 0.7282 0.1054 -0.1211 0.061 Uiso 1 1 calc R . . 
C20 C 0.8538(2) 0.07903(13) 0.03046(10) 0.0322(5) Uani 1 1 d . . . 
H20X H 0.8303 0.0404 0.0642 0.048 Uiso 1 1 calc R . . 
H20Y H 0.8431 0.1326 0.0478 0.048 Uiso 1 1 calc R . . 
H20Z H 0.9525 0.0710 0.0167 0.048 Uiso 1 1 calc R . . 
 
loop_ 
 _atom_site_aniso_label 
 _atom_site_aniso_U_11 
 _atom_site_aniso_U_22 
 _atom_site_aniso_U_33 
 _atom_site_aniso_U_23 
 _atom_site_aniso_U_13 
 _atom_site_aniso_U_12 
Zr1 0.01941(10) 0.01658(10) 0.01551(9) -0.00221(7) 0.00111(7) -0.00028(7) 
Cl1 0.0275(3) 0.0317(3) 0.0231(2) 0.0009(2) 0.0049(2) -0.0085(2) 
Cl2 0.0316(3) 0.0329(3) 0.0176(2) -0.00241(19) -0.0016(2) -0.0087(2) 
Cl3 0.0245(3) 0.0205(2) 0.0315(3) -0.0008(2) -0.0003(2) 0.00351(19) 
Cl4 0.0258(3) 0.0250(2) 0.0269(2) -0.00284(19) 0.0088(2) -0.0027(2) 
P1 0.0209(2) 0.0157(2) 0.0145(2) -0.00075(18) 0.00217(19) 0.00039(19) 
Si1 0.0249(3) 0.0238(3) 0.0187(3) 0.0007(2) -0.0037(2) 0.0018(2) 
Si2 0.0296(3) 0.0216(3) 0.0249(3) 0.0056(2) -0.0051(2) 0.0016(2) 
N1 0.0201(8) 0.0166(7) 0.0161(7) -0.0005(6) 0.0001(6) 0.0011(6) 
N2 0.0221(8) 0.0178(8) 0.0148(7) 0.0003(6) 0.0008(6) 0.0025(7) 
C1 0.0245(10) 0.0182(9) 0.0208(9) -0.0003(8) 0.0014(8) -0.0002(8) 
C2 0.0344(12) 0.0262(10) 0.0214(10) -0.0036(8) 0.0071(9) -0.0043(9) 
C3 0.0491(14) 0.0271(11) 0.0312(12) -0.0124(9) 0.0106(10) -0.0083(10) 
C4 0.0449(14) 0.0300(12) 0.0453(14) -0.0102(10) 0.0126(11) -0.0175(11) 
C5 0.0508(15) 0.0380(13) 0.0525(15) -0.0157(11) 0.0307(12) -0.0182(12) 
C6 0.0455(14) 0.0283(11) 0.0357(12) -0.0132(10) 0.0187(10) -0.0103(10) 
C7 0.0216(10) 0.0236(10) 0.0155(9) -0.0041(7) 0.0015(7) -0.0022(8) 
C8 0.0289(11) 0.0249(10) 0.0244(10) -0.0010(8) 0.0037(9) -0.0008(9) 
C9 0.0354(12) 0.0356(12) 0.0242(11) 0.0032(9) 0.0068(9) -0.0103(10) 
C10 0.0267(11) 0.0476(13) 0.0271(11) -0.0115(10) 0.0108(9) -0.0087(10) 
C11 0.0298(12) 0.0384(13) 0.0399(13) -0.0094(10) 0.0107(10) 0.0068(10) 
C12 0.0339(12) 0.0273(11) 0.0304(11) -0.0002(9) 0.0061(9) 0.0042(9) 
C13 0.0429(14) 0.0418(13) 0.0271(11) -0.0065(10) -0.0133(10) 0.0064(11) 
C14 0.0257(11) 0.0456(14) 0.0354(12) -0.0027(10) -0.0037(9) 0.0026(10) 
C15 0.0430(13) 0.0314(12) 0.0346(12) 0.0098(10) -0.0069(10) 0.0034(10) 
C16 0.107(2) 0.0272(12) 0.0385(14) -0.0015(10) -0.0187(15) 0.0268(14) 
C17 0.0327(16) 0.086(2) 0.180(4) 0.080(3) -0.031(2) -0.0095(16) 
C18 0.115(3) 0.0393(14) 0.0219(12) 0.0079(10) -0.0038(14) 0.0217(16) 
N3 0.0241(9) 0.0327(10) 0.0346(10) -0.0065(8) 0.0011(8) -0.0037(8) 
C19 0.0448(14) 0.0445(14) 0.0321(12) 0.0009(10) 0.0051(10) 0.0083(11) 
C20 0.0255(11) 0.0348(12) 0.0362(12) -0.0011(9) -0.0012(9) -0.0024(9) 
 
_geom_special_details 
; 
 All esds (except the esd in the dihedral angle between two l.s. planes) 
 are estimated using the full covariance matrix.  The cell esds are taken 
 into account individually in the estimation of esds in distances, angles 
 and torsion angles; correlations between esds in cell parameters are only 
 used when they are defined by crystal symmetry.  An approximate (isotropic) 
 treatment of cell esds is used for estimating esds involving l.s. planes. 
; 
 
loop_ 
 _geom_bond_atom_site_label_1 
 _geom_bond_atom_site_label_2 
 _geom_bond_distance 
 _geom_bond_site_symmetry_2 
 _geom_bond_publ_flag 
Zr1 N1 2.1760(14) . ? 
Zr1 N2 2.1781(15) . ? 
Zr1 Cl4 2.4782(5) . ? 
Zr1 Cl2 2.4784(5) . ? 
Zr1 Cl1 2.4856(5) . ? 
Zr1 Cl3 2.4930(5) . ? 
P1 N1 1.6177(15) . ? 
P1 N2 1.6202(15) . ? 
P1 C1 1.8050(19) . ? 
P1 C7 1.8106(18) . ? 
Si1 N1 1.7517(15) . ? 
Si1 C14 1.857(2) . ? 
Si1 C13 1.866(2) . ? 
Si1 C15 1.867(2) . ? 
Si2 N2 1.7516(15) . ? 
Si2 C17 1.843(3) . ? 
Si2 C18 1.849(2) . ? 
Si2 C16 1.867(2) . ? 
C1 C2 1.391(3) . ? 
C1 C6 1.394(3) . ? 
C2 C3 1.386(3) . ? 
C3 C4 1.373(3) . ? 
C4 C5 1.384(3) . ? 
C5 C6 1.380(3) . ? 
C7 C12 1.392(3) . ? 
C7 C8 1.393(3) . ? 
C8 C9 1.391(3) . ? 
C9 C10 1.372(3) . ? 
C10 C11 1.382(3) . ? 
C11 C12 1.380(3) . ? 
N3 C20 1.475(2) . ? 
N3 C19 1.475(3) . ? 
 
loop_ 
 _geom_angle_atom_site_label_1 
 _geom_angle_atom_site_label_2 
 _geom_angle_atom_site_label_3 
 _geom_angle 
 _geom_angle_site_symmetry_1 
 _geom_angle_site_symmetry_3 
 _geom_angle_publ_flag 
N1 Zr1 N2 69.64(5) . . ? 
N1 Zr1 Cl4 97.40(4) . . ? 
N2 Zr1 Cl4 93.42(4) . . ? 
N1 Zr1 Cl2 166.49(4) . . ? 
N2 Zr1 Cl2 97.94(4) . . ? 
Cl4 Zr1 Cl2 88.387(18) . . ? 
N1 Zr1 Cl1 91.20(4) . . ? 
N2 Zr1 Cl1 96.44(4) . . ? 
Cl4 Zr1 Cl1 168.700(17) . . ? 
Cl2 Zr1 Cl1 84.816(17) . . ? 
N1 Zr1 Cl3 93.35(4) . . ? 
N2 Zr1 Cl3 162.84(4) . . ? 
Cl4 Zr1 Cl3 86.370(17) . . ? 
Cl2 Zr1 Cl3 99.204(18) . . ? 
Cl1 Zr1 Cl3 85.822(18) . . ? 
N1 P1 N2 100.32(8) . . ? 
N1 P1 C1 111.64(8) . . ? 
N2 P1 C1 111.56(8) . . ? 
N1 P1 C7 111.64(8) . . ? 
N2 P1 C7 113.03(8) . . ? 
C1 P1 C7 108.54(8) . . ? 
N1 Si1 C14 109.28(9) . . ? 
N1 Si1 C13 110.75(9) . . ? 
C14 Si1 C13 108.93(10) . . ? 
N1 Si1 C15 108.47(9) . . ? 
C14 Si1 C15 110.80(10) . . ? 
C13 Si1 C15 108.62(10) . . ? 
N2 Si2 C17 108.88(10) . . ? 
N2 Si2 C18 108.92(10) . . ? 
C17 Si2 C18 109.95(16) . . ? 
N2 Si2 C16 112.66(9) . . ? 
C17 Si2 C16 110.94(16) . . ? 
C18 Si2 C16 105.42(12) . . ? 
P1 N1 Si1 130.07(9) . . ? 
P1 N1 Zr1 95.01(7) . . ? 
Si1 N1 Zr1 134.54(8) . . ? 
P1 N2 Si2 130.90(9) . . ? 
P1 N2 Zr1 94.85(7) . . ? 
Si2 N2 Zr1 134.08(8) . . ? 
C2 C1 C6 118.74(18) . . ? 
C2 C1 P1 125.49(14) . . ? 
C6 C1 P1 115.72(14) . . ? 
C3 C2 C1 120.32(18) . . ? 
C4 C3 C2 120.35(19) . . ? 
C3 C4 C5 120.0(2) . . ? 
C6 C5 C4 120.1(2) . . ? 
C5 C6 C1 120.56(19) . . ? 
C12 C7 C8 118.43(17) . . ? 
C12 C7 P1 122.48(15) . . ? 
C8 C7 P1 119.07(14) . . ? 
C9 C8 C7 120.28(19) . . ? 
C10 C9 C8 120.4(2) . . ? 
C9 C10 C11 119.99(19) . . ? 
C12 C11 C10 120.0(2) . . ? 
C11 C12 C7 120.9(2) . . ? 
C20 N3 C19 113.77(17) . . ? 
 
_diffrn_measured_fraction_theta_max    1.000 
_diffrn_reflns_theta_full              25.00 
_diffrn_measured_fraction_theta_full   1.000 
_refine_diff_density_max    0.303 
_refine_diff_density_min   -0.259 
_refine_diff_density_rms    0.049 
